# Supplementary material
Source: PubMed Central journal article supplement (PMC7350522)
Supplement: media-1.pdf [file media-1.pdf]

## SUPPLEMENTARY DATA

**Supplementary Table 1.** Immunogenicity and efficacy results for adjuvant screening. n/s: not significant, M: moderate, S: severe. ND: Not detected. N/A: not available

| Vaccination Groups           | NT <sub>100</sub> (log <sub>2</sub> ) | NT <sub>50</sub> (Log <sub>2</sub> ) | infectious virus/gram (dpi) | Infiltration grades (dpi) | EOS# (dpi) | Specific IgG titers (x 10 <sup>3</sup> ) (ELISA) | IgG1/IgG2a ratios |
|------------------------------|---------------------------------------|--------------------------------------|-----------------------------|---------------------------|------------|--------------------------------------------------|-------------------|
| RBD219-N1/Alhydrogel         | 1,280 (10)                            | --*                                  | ND** (3)                    | 1 (3)                     | n/s (3)    | 512                                              | 4                 |
|                              | 640 (9)                               | 1,280 (10)                           | ND (3)                      |                           |            | 512                                              | 8                 |
|                              | 1,280 (10)                            | 2,560 (11)                           | ND (6)                      | 1 (6)                     | n/s (6)    | 128                                              | 4                 |
|                              | 640 (9)                               | 1,280 (10)                           | ND (6)                      |                           |            | 256                                              | 8                 |
| RBD219-N1/MF59-like adjuvant | N/A                                   | 20                                   | 7.5 x 10 <sup>4</sup> (3)   | 3 (3)                     | S          | 128                                              | 64                |
|                              | 80                                    | --                                   | 5 x 10 <sup>4</sup> (3)     | 3 (6)                     | S          | 256                                              | 1,024             |
|                              | N/A                                   | < 20                                 | ND (6)                      |                           |            | 512                                              | 64                |
|                              | N/A                                   | < 20                                 | Dead (6)                    |                           |            | 512                                              | 256               |
| RBD219-N1 alone              | N/A                                   | < 20                                 | 5 x 10 <sup>6</sup> (3)     | 2 (3)                     | M          | 0.1                                              | --                |
|                              | N/A                                   | < 20                                 | 7.5 x 10 <sup>6</sup> (3)   | --                        | --         | ND                                               | --                |
|                              | N/A                                   | < 20                                 | Dead (4)                    |                           |            | 0.4                                              | --                |
|                              | N/A                                   | < 20                                 | Dead (5)                    |                           |            | ND                                               | --                |

**Supplementary Table 2.** Immunogenicity and efficacy results for Alhydrogel dose-ranging study.

\* Sacrifice; \*\* Not applicable; # Not detected; § Death due to over anesthetization

| Groups                                                                            | Animal ID# | NT <sub>100</sub> | NT <sub>50</sub> | ELISA titers<br>RBD-specific IgG antibody | RBD-specific IgG1/IgG2a antibody ratio | Infectious virus/g (dpi)  | Eos-infiltration grade |
|-----------------------------------------------------------------------------------|------------|-------------------|------------------|-------------------------------------------|----------------------------------------|---------------------------|------------------------|
| RBD219-N1/<br>Alhydrogel<br>(RBD: 20, 10, 10 µg;<br>Alhydrogel: 500, 250, 250 µg) | 1          | > 1,280           | NA**             | 102,400                                   | 32                                     | ND# (3)                   | 1                      |
|                                                                                   | 2          | 640               | NA               | 102,400                                   | 16                                     | Death (OA)§               | NA                     |
|                                                                                   | 3          | 640               | 1,280            | 102,400                                   | 16                                     | ND (3)                    | 1                      |
|                                                                                   | 4          | 160               | 320              | 51,200                                    | 8                                      | ND (6)                    | 1                      |
|                                                                                   | 5          | 320               | 640              | 51,200                                    | 16                                     | ND (6)                    | 1                      |
|                                                                                   | 6          | > 1,280           | NA               | 51,200                                    | 32                                     | Death (OA)                | NA                     |
| RBD219-N1/<br>Alhydrogel<br>(RBD: 20, 10, 10 µg;<br>Alhydrogel: 160, 80, 80 µg)   | 7          | < 10              | NA               | 6,400                                     | 64                                     | 1 x 10 <sup>6</sup> (3)   | 2                      |
|                                                                                   | 8          | < 10              | NA               | 1,600                                     | 32                                     | 2.5 x 10 <sup>6</sup> (3) | 2                      |
|                                                                                   | 9          | < 10              | NA               | 200                                       | NA                                     | 2.5 x 10 <sup>6</sup> (3) | 2                      |
|                                                                                   | 10         | < 10              | NA               | 25,600                                    | 256                                    | Dead (6)                  | NA                     |
|                                                                                   | 11         | < 10              | NA               | 25,600                                    | 64                                     | 5 x 10 <sup>4</sup> (6)   | 2                      |
|                                                                                   | 12         | 40                | 80               | 25,600                                    | 64                                     | ND (6)                    | 2                      |
| RBD219-N1/<br>Alhydrogel<br>(RBD: 10, 10, 10 µg;<br>Alhydrogel: 80, 80, 80 µg)    | 13         | < 10              | NA               | 6,400                                     | 128                                    | 1 x 10 <sup>5</sup> (3)   | 2                      |
|                                                                                   | 14         | < 10              | NA               | 400                                       | NA                                     | Dead (3)                  | NA                     |
|                                                                                   | 15         | 160               | 320              | 25,600                                    | 64                                     | 1 x 10 <sup>4</sup> (3)   | 2                      |
|                                                                                   | 16         | 160               | NA               | 51,200                                    | 64                                     | ND (6)                    | 2                      |
|                                                                                   | 17         | 10                | 20               | 25,600                                    | 4                                      | ND (6)                    | 2                      |
|                                                                                   | 18         | < 10              | NA               | 800                                       | 32                                     | 2.5 x 10 <sup>4</sup> (6) | 2                      |
| TRIS-<br>Alhydrogel<br>(Alhydrogel: 160, 160, 160 µg)                             | 19         | < 10              | NA               | < 100                                     | NA                                     | Dead (3)                  | NA                     |
|                                                                                   | 20         | < 10              | NA               | < 100                                     | NA                                     | Dead (3)                  | NA                     |
|                                                                                   | 21         | < 10              | NA               | < 100                                     | NA                                     | 1 x 10 <sup>7</sup> (3)   | 1                      |
|                                                                                   | 22         | < 10              | NA               | < 100                                     | NA                                     | 5 x 10 <sup>5</sup> (3)   | 1                      |
|                                                                                   | 23         | < 10              | NA               | < 100                                     | NA                                     | 2.5 x 10 <sup>4</sup> (6) | 1                      |
|                                                                                   | 24         | < 10              | NA               | < 100                                     | NA                                     | 1 x 10 <sup>4</sup> (6)   | 1                      |
| SARS-S/Alum<br>(S: 3, 3, 3 µg;<br>Alum: pre-formulated)                           | 25         | 640               | NA               | 51,200                                    | 32                                     | ND (3)                    | 2+                     |
|                                                                                   | 26         | 320               | NA               | 25,600                                    | 16                                     | ND (3)                    | 2+                     |
|                                                                                   | 27         | 320               | NA               | 51,200                                    | 32                                     | ND (3)                    | 2+                     |
|                                                                                   | 28         | 320               | NA               | 51,200                                    | 32                                     | ND (6)                    | 2+                     |
|                                                                                   | 29         | 320               | NA               | 51,200                                    | 32                                     | ND (6)                    | 2+                     |
|                                                                                   | 30         | Sac*              | NA               | NA                                        | NA                                     | NA                        | NA                     |

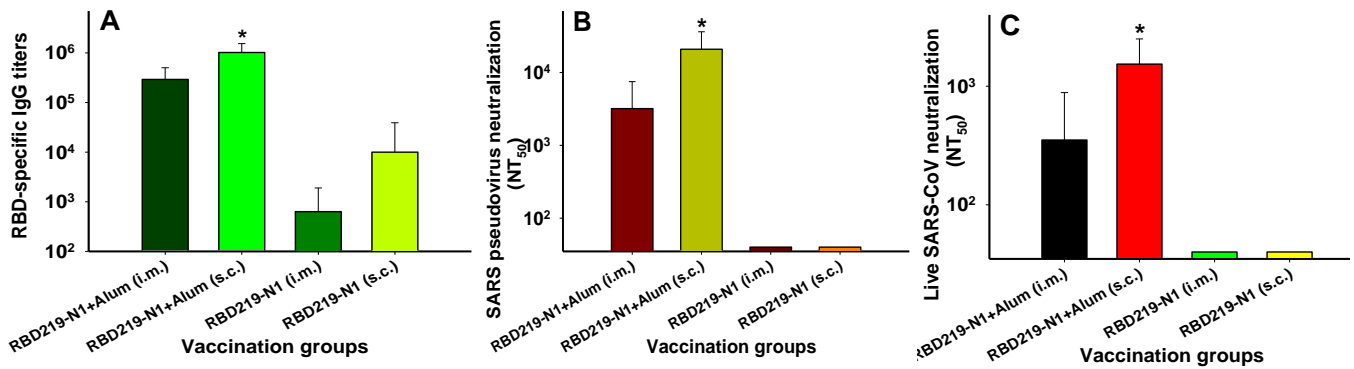

**Supplementary Figure 1. Optimization of immunization routes.** Mice were immunized with RBD219-N1 formulated with or without Alhydrogel® (1:25 ratio) subcutaneously (s.c.) or intramuscularly (i.m.), three times, at 3-week intervals. Sera were collected 10 days after the last immunization and tested for IgG antibody responses and for neutralizing antibodies against SARS pseudovirus and live SARS-CoV infections. (A) Detection of IgG antibody response by ELISA in mouse sera. Neutralization antibody titers against SARS pseudovirus (B) and live SARS-CoV (C) in mouse sera. [Alhydrogel® abbreviated as Alum.]. Pseudovirus was prepared as previously described in Chen et al., 2014 [20].
